# Supplementary material for: A Novel Recombinant Fcγ Receptor-Targeted Survivin Combines with Chemotherapy for Efficient Cancer Treatment
Source: MDPI journal article supplement (doi:10.3390/biomedicines9070806), 2021-07-12
Supplement: s1 [file s1]

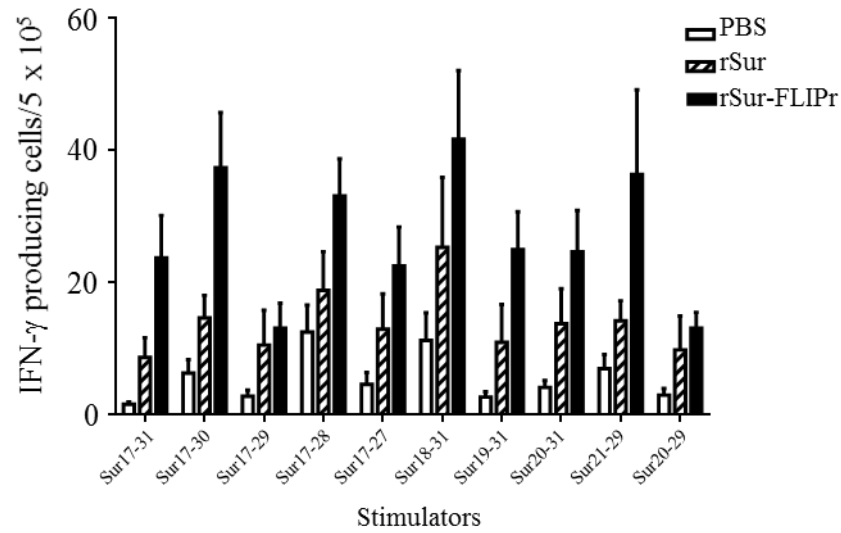

**Figure S1. Identification of the epitope within survivin<sub>17-30</sub>.** Groups of C57BL/6 mice (n = 6/group, pooled from two independent experiments) were immunized twice with 30 µg of rSur or rSur-FLIPr at a 2-week interval. Mice immunized with PBS were used as the controls. Splenocytes were prepared 1 week after the last immunization. A panel of peptides that covered the sequence of survivin<sub>17-31</sub> was used to stimulate splenocytes for 72 hours in anti-IFN-γ-coated 96-well ELISPOT plates. The IFN-γ-secreting spots were examined using an ELISPOT reader. The data are expressed as the means ± SEM.
